# Supplementary material for: Molecular Structure Characteristics and Wetting Behaviors of Alkyl Binary Doped Ionic Liquids’ Thin Lubricating Films on Silicon Surfaces: Molecular Dynamics Simulations
Source: Hindawi journal article supplement (doi:10.1155/2019/1629391), 2019-01-01
Supplement: f1 [file 1629391.f1.pdf]

The parameters of the [CMIM]Cl molecules in simulations are listed in **Table I**.

**Table I New Atom Types and Parameters for [CMIM]Cl**

| atom types      |          |         |                                                     |           |           |
|-----------------|----------|---------|-----------------------------------------------------|-----------|-----------|
| type            | mass     | element | comment                                             |           |           |
| o2h             | 15.9994  | O       | hydroxyl oxygen                                     |           |           |
| o1=             | 15.9994  | O       | oxygen in carbonyl                                  |           |           |
| c3'             | 12.01115 | C       | carbonyl carbon                                     |           |           |
| c4              | 12.01115 | C       | generic sp <sup>3</sup> carbon                      |           |           |
| c4z             | 12.01115 | C       | carbon, sp <sup>3</sup> , bonded to -N <sub>3</sub> |           |           |
| c3a             | 12.01115 | C       | aromatic carbon                                     |           |           |
| n2=             | 14.0067  | N       | nitrogen                                            |           |           |
| Equivalences    |          |         |                                                     |           |           |
| type            | nonB     | bond    | angle                                               | torsion   | oop       |
| o2h             | o2h      | o2h     | o2                                                  | o2        | o2        |
| o1=             | o1=      | o1=     | o1=                                                 | o1=       | o1=       |
| c3'             | c3'      | c3'     | c3'                                                 | c3'       | c3'       |
| c4              | c4       | c4      | c4                                                  | c4        | c4        |
| c4z             | c4z      | c4      | c4                                                  | c4        | c4        |
| c3a             | c3a      | c3a     | c3a                                                 | c3a       | c3a       |
| n2=             | n2=      | n2=     | n2=                                                 | n2=       | n2=       |
| Bond Increments |          |         |                                                     |           |           |
| c3a             |          | n2=     |                                                     | 0.199     | 0.199     |
| n2=             |          | c4z     |                                                     | 0.345     | 0.345     |
| c3a             |          | c3a     |                                                     | 0         | 0         |
| n2=             |          | c4      |                                                     | 0.345     | 0.345     |
| c4              |          | c4z     |                                                     | 0         | 0         |
| c4              |          | c3'     |                                                     | 0         | 0         |
| c3'             |          | o1=     |                                                     | 0.45      | -0.45     |
| Bond            |          |         |                                                     |           |           |
| <i>I</i>        | <i>J</i> | R0      | K2                                                  | K3        | K4        |
| n2=             | c3a      | 1.4     | 350                                                 | 0         | 0         |
| n2=             | c4z      | 1.474   | 337.06                                              | -147.37   | 213.633   |
| c3a             | c3a      | 1.417   | 470.8361                                            | -627.6179 | 1327.6345 |
| n2=             | c4       | 1.474   | 337.06                                              | -147.37   | 213.633   |
| c4              | c4z      | 1.53    | 299.67                                              | -501.77   | 679.81    |
| c4              | c3'      | 1.514   | 312.3719                                            | -465.829  | 473.83    |

|                  |          |          |          |            |          |         |
|------------------|----------|----------|----------|------------|----------|---------|
| c3'              | o1=      | 1.216    | 823.7948 | -1878.7939 | 2303.531 |         |
| Angle            |          |          |          |            |          |         |
| <i>I</i>         | <i>J</i> | <i>K</i> | Theta0   | K2         | K3       | K4      |
| c3a              | n2=      | c3a      | 120      | 60         | 0        | 0       |
| n2=              | c3a      | c3a      | 120      | 60         | 0        | 0       |
| c3a              | c3a      | n2=      | 120      | 60         | 0        | 0       |
| n2=              | c4z      | c4       | 117.317  | 55.242     | 0        | 0       |
| c4               | c3'      | o1=      | 119.3    | 65.1016    | -17.9766 | 0       |
| c4               | c3'      | o2h      | 100.3182 | 88.8631    | -3.8323  | -7.9802 |
| o1=              | c3'      | o2h      | 118.9855 | 98.6813    | -22.2485 | 10.3673 |
| Torsion          |          |          |          |            |          |         |
| <i>I</i>         | <i>J</i> | <i>K</i> | <i>L</i> | V1         | V2       | V3      |
| c3a              | n2=      | c3a      | c3a      | 0          | 1        | 0       |
| c4z              | n2=      | c3a      | c3a      | 0          | 1        | 0       |
| c3a              | n2=      | c3a      | n2=      | 0          | 1        | 0       |
| c4z              | n2=      | c3a      | n2=      | 0          | 1        | 0       |
| c3a              | n2=      | c4       | c4       | 0          | 0        | -0.02   |
| n2=              | c3a      | c3a      | n2=      | 0          | 4.5      | 0       |
| c3a              | c3a      | n2=      | c3a      | 0          | 0        | 0       |
| n2=              | c4z      | c4       | c3'      | 0          | 0        | 0       |
| c4z              | c4       | c3'      | o1=      | 0          | 0.78     | 0       |
| c4z              | c4       | c3'      | o2h      | -2.5594    | 2.2013   | 0.0325  |
| Non-bond (LI9-6) |          |          |          |            |          |         |
| <i>I</i>         |          | <i>r</i> |          | <i>E</i>   |          |         |
| c3'              |          | 3.9      |          | 0.064      |          |         |
| c4               |          | 3.854    |          | 0.062      |          |         |
| c4z              |          | 3.65     |          | 0.08       |          |         |
| c3a              |          | 3.915    |          | 0.068      |          |         |
| o1=              |          | 3.43     |          | 0.192      |          |         |
| o2h              |          | 3.58     |          | 0.096      |          |         |
| n2=              |          | 3.83     |          | 0.096      |          |         |

The parameters of the [DMIM]PF<sub>6</sub> molecules in simulations are listed in **Table II**.

**Table II New Atom Types and Parameters for [DMIM]PF<sub>6</sub>**

| atom types |          |         |                                |
|------------|----------|---------|--------------------------------|
| type       | mass     | element | comment                        |
| c4         | 12.01115 | C       | generic sp <sup>3</sup> carbon |
| c4z        | 12.01115 | C       | carbon, sp <sup>3</sup> ,      |

|                 |          |          |          |           |                 |         |
|-----------------|----------|----------|----------|-----------|-----------------|---------|
| c3a             |          | 12.01115 |          | C         | aromatic carbon |         |
| n2=             |          | 14.0067  |          | N         | nitrogen        |         |
| Equivalences    |          |          |          |           |                 |         |
| type            | nonB     | bond     | angle    | torsion   | oop             |         |
| c4              | c4       | c4       | c4       | c4        | c4              |         |
| c4z             | c4z      | c4       | c4       | c4        | c4              |         |
| c3a             | c3a      | c3a      | c3a      | c3a       | c3a             |         |
| n2=             | n2=      | n2=      | n2=      | n2=       | n2=             |         |
| Bond Increments |          |          |          |           |                 |         |
| c3a             |          | n2=      |          | 0.199     | 0.199           |         |
| n2=             |          | c4z      |          | 0.345     | 0.345           |         |
| c3a             |          | c3a      |          | 0         | 0               |         |
| n2=             |          | c4       |          | 0.345     | 0.345           |         |
| c4              |          | c4z      |          | 0         | 0               |         |
| Bond            |          |          |          |           |                 |         |
| <i>I</i>        | <i>J</i> | R0       | K2       | K3        | K4              |         |
| n2=             | c3a      | 1.4      | 350      | 0         | 0               |         |
| n2=             | c4z      | 1.474    | 337.06   | -147.37   | 213.633         |         |
| c3a             | c3a      | 1.417    | 470.8361 | -627.6179 | 1327.6345       |         |
| n2=             | c4       | 1.474    | 337.06   | -147.37   | 213.633         |         |
| c4              | c4       | 1.53     | 299.67   | -501.77   | 679.81          |         |
| Angle           |          |          |          |           |                 |         |
| <i>I</i>        | <i>J</i> | <i>K</i> | Theta0   | K2        | K3              | K4      |
| c3a             | n2=      | c3a      | 120      | 60        | 0               | 0       |
| n2=             | c3a      | c3a      | 120      | 60        | 0               | 0       |
| c3a             | c3a      | n2=      | 120      | 60        | 0               | 0       |
| n2=             | c4z      | c4       | 117.317  | 55.242    | 0               | 0       |
| c4z             | c4       | c4       | 112.67   | 39.516    | -7.443          | -9.5583 |
| c4              | c4       | c4       | 112.67   | 39.516    | -7.443          | -9.5583 |
| Torsion         |          |          |          |           |                 |         |
| <i>I</i>        | <i>J</i> | <i>K</i> | <i>L</i> | V1        | V2              | V3      |
| c3a             | n2=      | c3a      | c3a      | 0         | 1               | 0       |
| c4z             | n2=      | c3a      | c3a      | 0         | 1               | 0       |
| c3a             | n2=      | c3a      | n2=      | 0         | 1               | 0       |
| c4z             | n2=      | c3a      | n2=      | 0         | 1               | 0       |
| c3a             | n2=      | c4       | c4       | 0         | 0               | -0.02   |
| n2=             | c3a      | c3a      | n2=      | 0         | 4.5             | 0       |
| c3a             | c3a      | n2=      | c3a      | 0         | 0               | 0       |
| c4              | c4       | c4       | c4       | 0         | 0.0514          | -0.143  |

---

| Non-bond (LI9-6) |          |               |
|------------------|----------|---------------|
| <i>I</i>         | <i>r</i> | $\mathcal{E}$ |
| c4               | 3.854    | 0.062         |
| c4z              | 3.65     | 0.08          |
| c3a              | 3.915    | 0.068         |
| n2=              | 3.83     | 0.096         |

---
